# Supplementary material for: 中世の修道士と書物 (特集 中世人の心のかたち)
Source: Royal Society of Chemistry journal article supplement (doi:10.1039/d2ra03180a), 2008-01-01
Supplement: d2ra03180a2.pdf [file d2ra03180a2.pdf]

## Supporting Information

### **Ancillary Ligand Effects on $\alpha$ -olefin Polymerization Catalyzed by Zirconium Metallocene: A Computational Study**

Yanan Zhao,<sup>†</sup> Xianming Xu,<sup>§</sup> Yulong Wang,<sup>§</sup> Tong Liu,<sup>§</sup> Hongpeng Li,<sup>§</sup> Yongjun Zhang,<sup>§</sup>  
Libo Wang,<sup>§</sup> Xiuhui Wang,<sup>§</sup> Simeng Zhao,<sup>§</sup> Yi Luo<sup>†,‡,\*</sup>

<sup>†</sup>*State Key Laboratory of Fine Chemicals, School of Chemical Engineering, Dalian University of Technology, Dalian 116024, China.*

<sup>‡</sup>*PetroChina Petrochemical Research Institute, Beijing, 102206, China.*

<sup>§</sup>*Daqing Petrochemical Research Center of PetroChina, Daqing 163714, China.*

\**E-mail:*

*luoyi@dlut.edu.cn*

**Table S1.** Computed energy profiles for **Cat.1** mediated coordination insertion of **m** in the chain initiation and chain propagation stages. Free energies are relative to isolated reactants. The most favorable pathways are in green.

|                | First insertion |             |              |                     | Second insertion |              |              |                     |
|----------------|-----------------|-------------|--------------|---------------------|------------------|--------------|--------------|---------------------|
| Mode           | Coor.           | TS          | Pro.         | $\Delta G^\ddagger$ | Coor.            | TS           | Pro.         | $\Delta G^\ddagger$ |
| 1,2- <i>re</i> | -3.4            | 12.3        | -6.8         | 15.7                | <b>-8.5</b>      | <b>3.1</b>   | <b>-16.2</b> | <b>11.6</b>         |
| 1,2- <i>si</i> | <b>-0.7</b>     | <b>11.4</b> | <b>-8.0</b>  | <b>12.1</b>         | 2.8              | 5.8          | -19.3        | 13.8                |
| 2,1- <i>re</i> | -1.4            | 20.8        | 4.8          | 22.2                | /                |              |              |                     |
| 2,1- <i>si</i> | -2.2            | 16.9        | -1.3         | 19.1                | /                |              |              |                     |
|                | Third insertion |             |              |                     | Fourth insertion |              |              |                     |
| Mode           | Coor.           | TS          | Pro.         | $\Delta G^\ddagger$ | Coor.            | TS           | Pro.         | $\Delta G^\ddagger$ |
| 1,2- <i>re</i> | <b>-8.3</b>     | <b>-4.9</b> | <b>-27.0</b> | <b>11.3</b>         | <b>-16.5</b>     | <b>-15.1</b> | <b>-35.0</b> | <b>11.9</b>         |
| 1,2- <i>si</i> | -6.8            | -4.4        | -25.1        | 11.8                | -12.0            | -8.3         | -31.4        | 18.8                |

**Table S2.** Computed energy profiles for **Cat.2** mediated coordination insertion of **m** in the chain initiation and chain propagation stages. Free energies are relative to isolated reactants. The most favorable pathways are in green.

|                | First insertion |             |              |                     | Second insertion |              |              |                     |
|----------------|-----------------|-------------|--------------|---------------------|------------------|--------------|--------------|---------------------|
| Mode           | Coor.           | TS          | Pro.         | $\Delta G^\ddagger$ | Coor.            | TS           | Pro.         | $\Delta G^\ddagger$ |
| 1,2- <i>re</i> | -4.8            | 10.9        | -7.0         | 14.4                | <b>-10.7</b>     | <b>1.4</b>   | <b>-14.8</b> | <b>12.1</b>         |
| 1,2- <i>si</i> | <b>-3.2</b>     | <b>9.7</b>  | <b>-7.1</b>  | <b>12.9</b>         | -9.6             | 4.2          | -19.0        | 13.8                |
| 2,1- <i>re</i> | -4.4            | 17.5        | -0.8         | 21.9                | /                |              |              |                     |
| 2,1- <i>si</i> | -4.3            | 14.7        | -6.0         | 18.9                | /                |              |              |                     |
|                | Third insertion |             |              |                     | Fourth insertion |              |              |                     |
| Mode           | Coor.           | TS          | Pro.         | $\Delta G^\ddagger$ | Coor.            | TS           | Pro.         | $\Delta G^\ddagger$ |
| 1,2- <i>re</i> | <b>-18.4</b>    | <b>-8.5</b> | <b>-26.1</b> | <b>9.9</b>          | <b>-22.8</b>     | <b>-15.9</b> | <b>-37.2</b> | <b>10.5</b>         |
| 1,2- <i>si</i> | -17.9           | -6.5        | -27.2        | 12.0                | -22.7            | -10.5        | -31.0        | 15.9                |

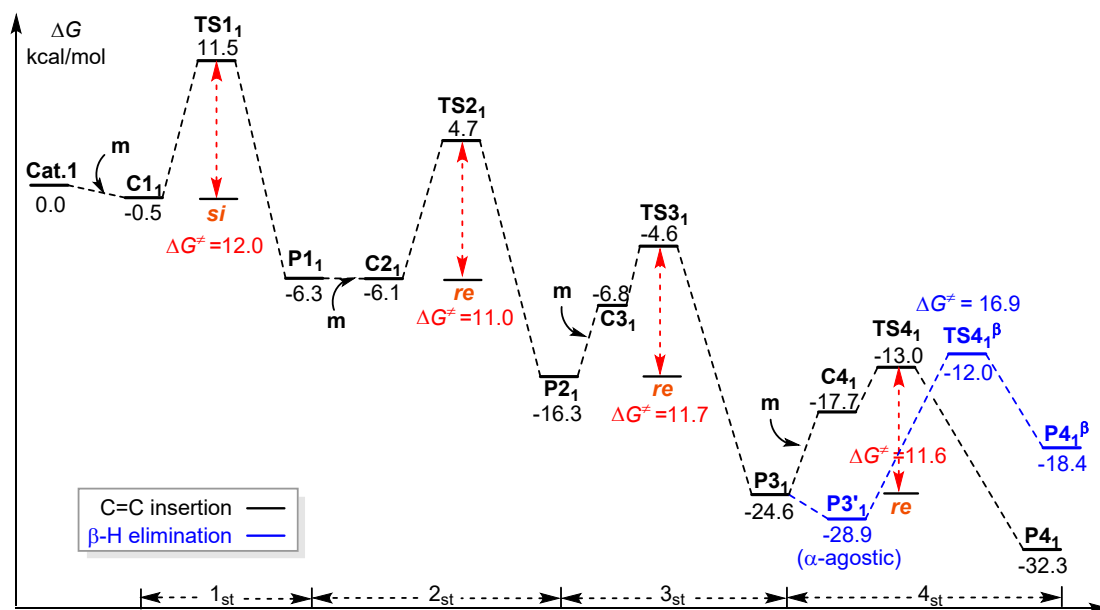

**Figure S1.** Computed energy profiles (M06(SMD)/6-311G\*\* $\cap$ SDD//B3PW91+D3/6-31-G\*\* $\cap$ SDD) for **Cat.1** mediated chain initiation and chain propagation of **m**. The C=C insertion and  $\beta$ -H elimination pathways are indicated in black and blue, respectively.

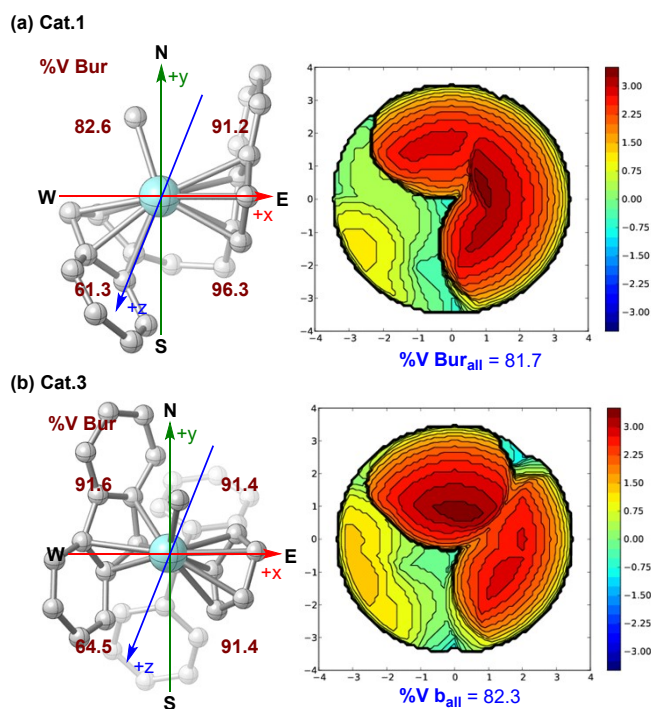

**Figure S2.** Topographical steric maps of catalysts **1** and **2**.
